# Supplementary material for: Concurrent cisplatin and 5-fluorouracil versus concurrent cisplatin and docetaxel with radiotherapy for esophageal squamous cell carcinoma: a propensity score-matched analysis
Source: PubMed Central journal article supplement (PMC5190128; doi:10.18632/oncotarget.9301), 2016-05-11
Supplement: oncotarget-07-44686-s001.pdf [file oncotarget-07-44686-s001.pdf]

## Concurrent cisplatin and 5-fluorouracil *versus* concurrent cisplatin and docetaxel with radiotherapy for esophageal squamous cell carcinoma: a propensity score-matched analysis

### Supplementary Material

**Supplementary Table S1: Literature overview of clinical trials concerning PF or DP in definite chemoradiotherapy for esophageal cancer.**

| Author       | No  | Histology         | Chemotherapy                                                                                              | Radiotherapy             | Response                                         | Survival                        | Toxicitygr 3-4                                                                  |                                                                    |
|--------------|-----|-------------------|-----------------------------------------------------------------------------------------------------------|--------------------------|--------------------------------------------------|---------------------------------|---------------------------------------------------------------------------------|--------------------------------------------------------------------|
| [Reference]  |     |                   |                                                                                                           |                          |                                                  |                                 | Hematological                                                                   | Non-hematological                                                  |
| Cooper [4]   | 61  | SCC:51<br>ADC:10  | Cisplatin 75 mg/m <sup>2</sup> and 5-Fu 1g/m <sup>2</sup>                                                 | 50Gy/25f                 | By follow-up<br>Complete: 27%,<br>Persistent:26% | 5-year OS: 26%                  |                                                                                 |                                                                    |
| Minsky [11]  | 218 | SCC:187<br>ADC:31 | 5-Fu 1g/m <sup>2</sup> for4 days and cisplatin 75 mg/m <sup>2</sup>                                       | A: 64.8Gy<br>B: 50.4Gy   |                                                  | 2-year OS:<br>A: 31%;<br>B: 40% | A: 73 (67%);<br>B: 75 (69%)                                                     |                                                                    |
| Ishida [5]   | 60  | SCC               | Cisplatin 70 mg/m <sup>2</sup> on days 1, 29 and5-FU<br>700 mg/m <sup>2</sup> /day on days 1–4 , 29–32    | 60Gy/30f                 | CR: 9 (15.0%)<br>PR: 32 (53.3%)                  | 2-year OS: 31.5%                | Leukocyte: 20;<br>Hemoglobin: 4;<br>Platelet:3;<br>Neutrophil: 5                | Esophagitis:2; ALT:6;<br>Nausea:3; Infection:1;<br>Dyspnea:2       |
| Bedenne [12] | 142 | SCC:124<br>ADC:18 | 5-FU 800 mg/m <sup>2</sup> /day on Days 1-5 and<br>Cisplatin15 mg/m <sup>2</sup> on Days 1-5 for 5 cycles | 66Gy/33f or 45<br>Gy/15f |                                                  | 2-year OS: 36.5%                | Leukocytes :26;<br>Febrile<br>neutropenia:3;<br>Hemoglobin:3;<br>Thrombocytes:9 | Vomiting:9;<br>Esophagitis:5;<br>Cardiovascular:2;<br>Stomatitis:1 |
| Kato [13]    | 76  | SCC               | 5-FU 400 mg/m <sup>2</sup> /day on Days 1-5 and 8-12,                                                     | 60Gy/30f                 | CR: 46 (62.2%)                                   | 3- 5- year OS:44.7%             |                                                                                 | Esophagitis :17%;                                                  |

|                |     |                      |                                                                                                                                                                                                                         |                    |                                                          |                                                                     |                                                                                                       |                                                                           |
|----------------|-----|----------------------|-------------------------------------------------------------------------------------------------------------------------------------------------------------------------------------------------------------------------|--------------------|----------------------------------------------------------|---------------------------------------------------------------------|-------------------------------------------------------------------------------------------------------|---------------------------------------------------------------------------|
|                |     |                      | and Cisplatin 40 mg/m <sup>2</sup> on Days 1 and 8 every 5 weeks                                                                                                                                                        |                    |                                                          | and 36.8%                                                           |                                                                                                       | Nausea :17% ;<br>Hyponatremia :16% ;<br>Infection without neutropenia:12% |
| Nishimura [14] | 91  | SCC:90<br>ADE:1      | A:cisplatin 70 mg/m <sup>2</sup> Days 1 and 29 and 5-FU 700 mg/m <sup>2</sup> Days 1–5 and 29–33<br>B:cisplatin 7 mg/m <sup>2</sup> Days 1–5, 8–12, 29–33 and 36–40, and 5-FU 250 mg/m <sup>2</sup> Days 1–14 and 29–42 | 60Gy/30f           |                                                          | A: 2- and 5-year OS: 46% and 35%<br>B: 2- and 5-year OS:44% and 22% |                                                                                                       |                                                                           |
| Conroy [15]    | 133 | SCC: 115<br>ADC:18   | 5-Fu 1000 mg/m <sup>2</sup> for 4 days and cisplatin 75 mg/m <sup>2</sup>                                                                                                                                               | 50Gy / 25f         | CR: 55 (43%)<br>PR: 28 (22%)                             | Median OS: 17.5m;<br>median PFS:9.4m                                | Anaemia: 14;<br>Thrombocytopenia:10 ;<br>Lymphopenia:22;<br>Neutropenia: 37;<br>Febrile neutropenia:9 | Dysphagia:31;<br>Asthenia:13;Oesophagitis :11;                            |
| Li [9]         | 59  | SCC                  | docetaxel 60 mg/m <sup>2</sup> ; cisplatin 80 mg/m <sup>2</sup> for 2 cycles every three weeks                                                                                                                          | 50–64 Gy / 25–35 f | CR: 71.2%<br>PR: 27.1%                                   | 3-year OS: 36.7%                                                    | Leukocytopenia:24;<br>Neutropenia: 32;<br>Anemia:1;<br>Thrombocytopenia:5                             | Esophagitis:5; Pleural effusion: 4; Cough: 2;<br>Liver function:1         |
| Day [25]       | 24  | SCC : 11<br>ADE : 13 | docetaxel 15–30 mg/m <sup>2</sup> and cisplatin 15–30 mg/m <sup>2</sup> per week                                                                                                                                        | 50Gy / 25f         | CR: 33%<br>PR: 17%                                       | 5-year OS: 30.5%<br>5-year PFS: 26.5%                               | 4 (16.6%)                                                                                             | Dysphagia: 9; Nausea: 3<br>Fatigue: 4; Feve: 1<br>Constipation:3          |
| Zhao [17]      | 90  | SCC                  | DP (n=45): docetaxel 75mg/m <sup>2</sup> and cisplatin 75mg/m <sup>2</sup> every 28 days;<br>PF (n=45): 5-FU at days 1–4 (250 mg/m <sup>2</sup> /day), and cisplatin (75 mg/m <sup>2</sup> ) every                      | 50.4Gy / 28f       | DP: CR: 40%<br>PR: 33.3% ;<br>PF: CR: 28.9%<br>PR: 24.4% | DP:median OS: 43.2m; median PFS: 25.3m;<br>PF:median                | DP: 16(35.6%);<br>PF:11 (24.4%)                                                                       | DP: Esophagitis: 8;<br>Pneumonia:3;<br>Mucositis:1;<br>PF: Esophagitis:   |

|  |  |  |         |  |  |                              |  |                                |
|--|--|--|---------|--|--|------------------------------|--|--------------------------------|
|  |  |  | 28 days |  |  | OS:22.3m;median<br>PFS:14.0m |  | 9;Pneumonia:2;<br>Mucositis:1; |
|--|--|--|---------|--|--|------------------------------|--|--------------------------------|

*Abbreviations:* DP: docetaxel and cisplatin; PF: cisplatin and fluorouracil; SCC: squamous cell carcinoma; ADE: adenocarcinoma; Fu:fluorouracil; OS: overall survival; PFS: progression-free survival.
